# Supplementary material for: Selection of appropriate solvent additives for the preparation of high-performance Cs 2 AgBiBr 6 solar cells
Source: Royal Society of Chemistry journal article supplement (doi:10.1039/d5se01404b), 2026-01-01
Supplement: d5se01404b2.xlsx [file d5se01404b2.xlsx]

## Sheet: Sheet1
Voltage (V)	Current density (mA/cm2)
1.2	-0.00032142
1.18685	-0.00023907
1.17375	-0.0001763
1.1606	-0.00013011
1.1475	-9.018e-05
1.13435	-5.798e-05
1.1212	-3.149e-05
1.1081	-1.246e-05
1.09495	6.48e-06
1.0818	1.851e-05
1.0687	3.23e-05
1.05555	4.326e-05
1.0424	5.243e-05
1.0293	6.01e-05
1.01615	6.656e-05
1.00305	7.194e-05
0.9899	7.658e-05
0.97675	8.042e-05
0.96365	8.365e-05
0.9505	8.648e-05
0.93735	8.882e-05
0.92425	9.082e-05
0.9111	9.258e-05
0.898	9.406e-05
0.88485	9.534e-05
0.8717	9.658e-05
0.8586	9.757e-05
0.84545	9.85e-05
0.8323	9.928e-05
0.8192	0.0001
0.80605	0.00010072
0.79295	0.00010147
0.7798	0.0001021
0.76665	0.00010275
0.75355	0.00010331
0.7404	0.00010382
0.72725	0.00010435
0.71415	0.00010485
0.701	0.00010536
0.6879	0.00010586
0.67475	0.00010635
0.6616	0.00010686
0.6485	0.00010734
0.63535	0.00010786
0.6222	0.00010822
0.6091	0.00010867
0.59595	0.00010904
0.58285	0.0001095
0.5697	0.00010992
0.55655	0.00011037
0.54345	0.00011075
0.5303	0.00011117
0.51715	0.00011152
0.50405	0.00011186
0.4909	0.00011227
0.4778	0.00011262
0.46465	0.00011306
0.4515	0.00011336
0.4384	0.00011368
0.42525	0.00011408
0.4121	0.00011451
0.399	0.00011482
0.38585	0.00011514
0.37275	0.00011552
0.3596	0.00011587
0.34645	0.00011619
0.33335	0.00011653
0.3202	0.00011678
0.30705	0.00011707
0.29395	0.00011726
0.2808	0.00011754
0.2677	0.00011781
0.25455	0.00011803
0.2414	0.00011832
0.2283	0.00011867
0.21515	0.00011894
0.202	0.00011912
0.1889	0.00011934
0.17575	0.00011957
0.16265	0.00011978
0.1495	0.00012005
0.13635	0.00012022
0.12325	0.00012038
0.1101	0.00012051
0.09695	0.00012072
0.08385	0.00012085
0.0707	0.00012098
0.0576	0.00012118
0.04445	0.00012133
0.0313	0.00012147
0.0182	0.00012165
0.00505	0.00012179
-0.0081	0.00012278
-0.0212	0.00012226
-0.03435	0.00012237
-0.04745	0.00012243
-0.0606	0.00012259
-0.07375	0.0001227
-0.08685	0.00012278
-0.1	0.00012296
