# Supplementary material for: Selection of appropriate solvent additives for the preparation of high-performance Cs 2 AgBiBr 6 solar cells
Source: Royal Society of Chemistry journal article supplement (doi:10.1039/d5se01404b), 2026-01-01
Supplement: d5se01404b3.xlsx [file d5se01404b3.xlsx]

## Sheet: Sheet1
Wavelength (nm)	EQE(%)
299.994	14.5943
309.995	29.0348
319.983	41.779
329.996	49.3968
339.996	54.5741
349.983	55.8637
359.993	55.5196
369.989	54.8232
380.007	51.0564
390.01	45.1366
399.998	40.2213
410.006	37.449
419.998	45.1412
430.01	53.5663
440.005	59.5815
450.018	53.0412
460.013	43.3222
469.989	38.4448
479.982	31.3477
489.992	22.4911
499.982	14.71
509.987	9.22503
520.007	5.7549
530.006	2.824
540.018	1.23365
550.007	0.48475
560.009	0.24605
569.987	0.15909
580.011	0.13378
590.011	0.11819
599.985	0.12415
