# Supplementary material for: Selection of appropriate solvent additives for the preparation of high-performance Cs 2 AgBiBr 6 solar cells
Source: Royal Society of Chemistry journal article supplement (doi:10.1039/d5se01404b), 2026-01-01
Supplement: d5se01404b5.xlsx [file d5se01404b5.xlsx]

## Sheet: Sheet1
Wavelength (nm)	EQE(%)
299.994	14.534
309.995	28.8353
319.983	40.793
329.996	48.5411
339.996	53.4964
349.983	54.4707
359.993	54.2816
369.989	52.6821
380.007	49.6925
390.01	44.394
399.998	39.3274
410.006	36.3028
419.998	43.5237
430.01	53.0103
440.005	58.2656
450.018	51.8601
460.013	42.3723
469.989	34.8375
479.982	29.9011
489.992	22.8475
499.982	13.3897
509.987	7.36509
520.007	4.19478
530.006	2.19426
540.018	0.91708
550.007	0.35082
560.009	0.1535
569.987	0.08631
580.011	0.06072
590.011	0.04623
599.985	0.04505
