# Supplementary material for: Selection of appropriate solvent additives for the preparation of high-performance Cs 2 AgBiBr 6 solar cells
Source: Royal Society of Chemistry journal article supplement (doi:10.1039/d5se01404b), 2026-01-01
Supplement: d5se01404b6.xlsx [file d5se01404b6.xlsx]

## Sheet: Sheet1
Wavelength (nm)	EQE(%)
309.995	29.9365
319.983	43.7776
329.996	52.1481
339.996	57.9461
349.983	60.2694
359.993	59.4731
369.989	58.4505
380.007	54.4684
390.01	48.2579
399.998	41.6028
410.006	40.7382
419.998	46.9623
430.01	57.4384
440.005	65.2058
450.018	56.8144
460.013	45.2383
469.989	38.7977
479.982	29.3238
489.992	20.2159
499.982	14.4248
509.987	9.87337
520.007	5.41233
530.006	2.21995
540.018	0.92169
550.007	0.4191
560.009	0.22949
569.987	0.151
580.011	0.12334
590.011	0.10719
599.985	0.11289
