# Supplementary material for: Selection of appropriate solvent additives for the preparation of high-performance Cs 2 AgBiBr 6 solar cells
Source: Royal Society of Chemistry journal article supplement (doi:10.1039/d5se01404b), 2026-01-01
Supplement: d5se01404b9.xlsx [file d5se01404b9.xlsx]

## Sheet: Sheet1
Wavelength (nm)	EQE(%)
299.994	16.3027
309.995	33.0151
319.983	46.4967
329.996	55.8291
339.996	62.5726
349.983	62.6943
359.993	62.1514
369.989	60.556
380.007	55.8548
390.01	48.7963
399.998	42.0576
410.006	38.4234
419.998	47.4529
430.01	58.8144
440.005	66.6377
450.018	57.6222
460.013	45.5842
469.989	37.455
479.982	32.7305
489.992	23.8509
499.982	13.9609
509.987	8.54473
520.007	4.98088
530.006	2.49523
540.018	1.00282
550.007	0.39898
560.009	0.20804
569.987	0.13653
580.011	0.11493
590.011	0.09996
599.985	0.10323
